# Supplementary material for: Lanthanoids Goes Healing: Lanthanoidic Metallopolymers and Their Scratch Closure Behavior
Source: MDPI journal article supplement (doi:10.3390/polym12040838), 2020-04-06
Supplement: s1 [file s1]

## Supporting information

# Lanthanoids goes healing: Lanthanoidic metallopolymers and their scratch closure behavior

**Stefan Götz**<sup>1,2</sup>, **Stefan Zechel**<sup>1,2</sup>, **Martin D. Hager**<sup>1,2\*</sup>, **Ulrich S. Schubert**<sup>1,2\*</sup>

<sup>1</sup> Laboratory of Organic and Macromolecular Chemistry (IOMC), Friedrich Schiller University Jena, Humboldtstr. 10, 07743 Jena, Germany; [www.schubert-group.de](http://www.schubert-group.de), [ulrich.schubert@uni-jena.de](mailto:ulrich.schubert@uni-jena.de); [martin.hager@uni-jena.de](mailto:martin.hager@uni-jena.de)

<sup>2</sup> Jena Center of Soft Matter (JCSM), Friedrich Schiller University Jena, Philosophenweg 7, 07743 Jena, Germany

Table of content:

|                                                 |    |
|-------------------------------------------------|----|
| 1. DSC curves of the polymers                   | S2 |
| 2. TGA curves of the polymers                   | S3 |
| 3. Animated surface of self-healing experiments | S5 |

1. DSC curves of the polymers

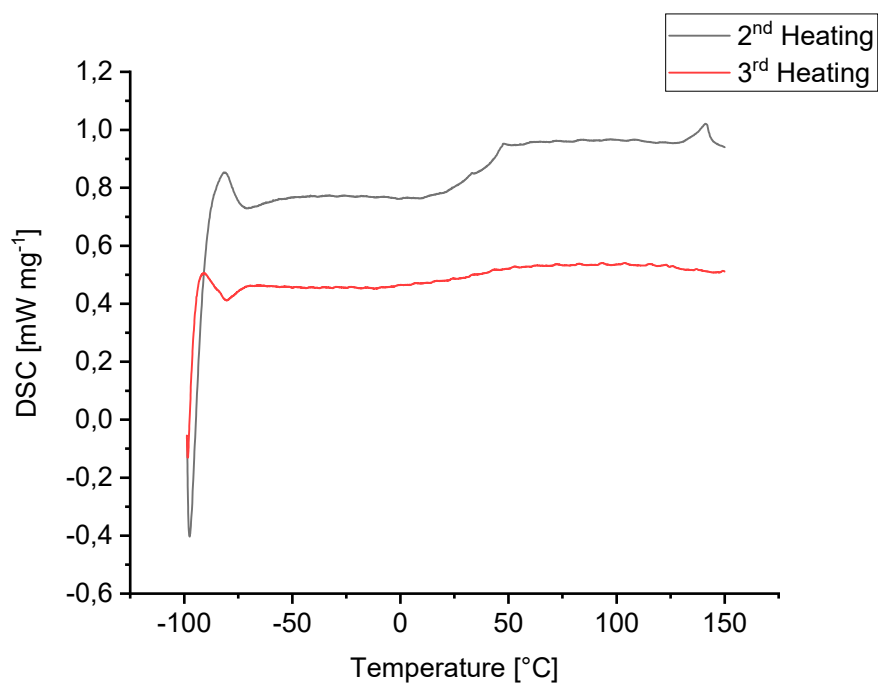

**Figure S1:** DSC heating cycles of **P2**.

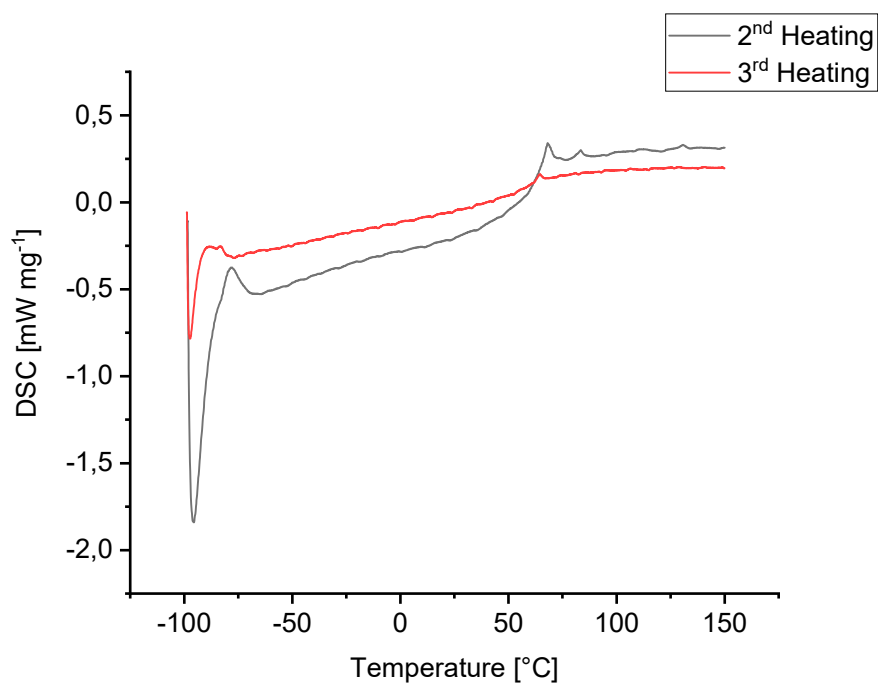

**Figure S2:** DSC heating cycles of **P3**.

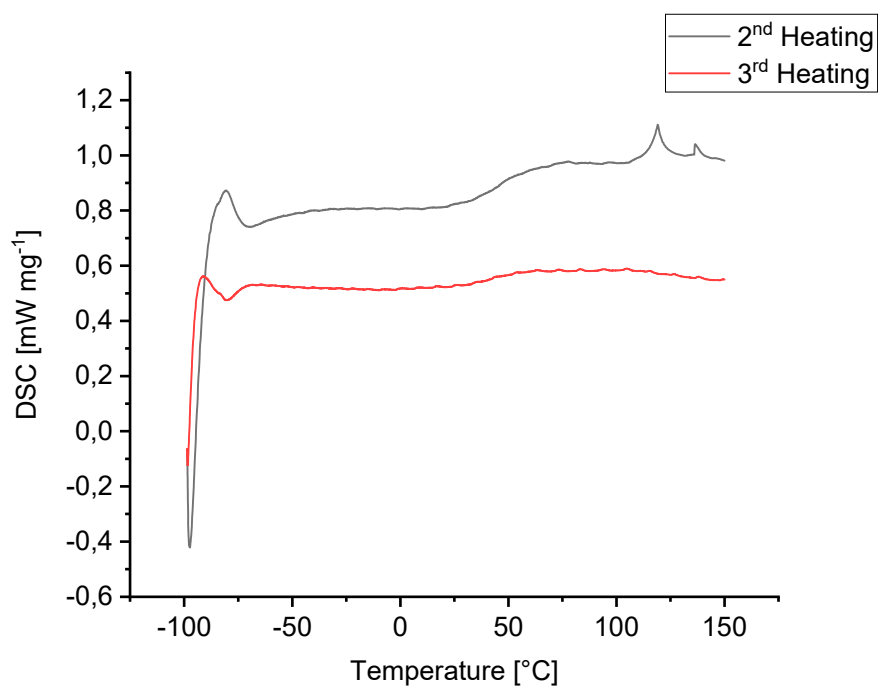

**Figure S3:** DSC heating cycles of **P4**.

2. TGA curves of the polymers

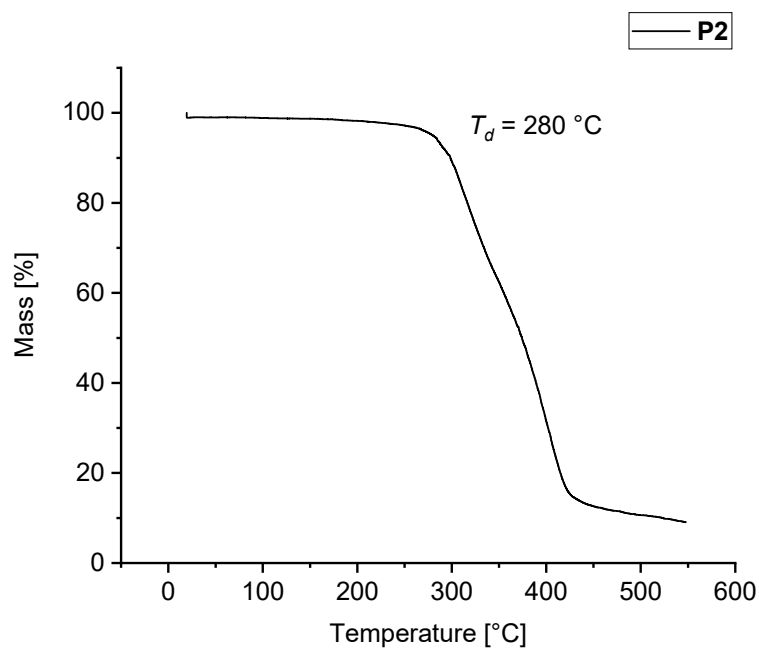

**Figure S4:** Trace of the TGA measurement of **P2**.

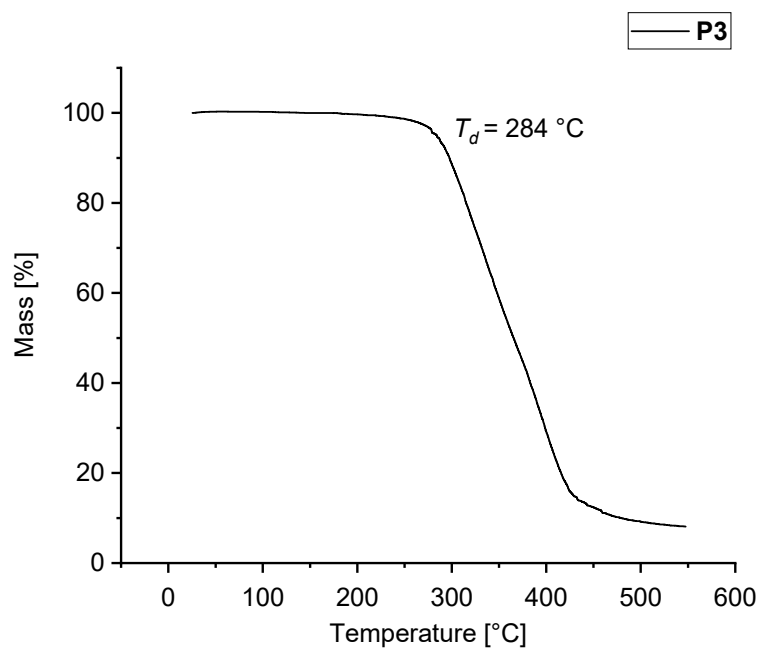

**Figure S5:** Trace of the TGA measurement of **P3**.

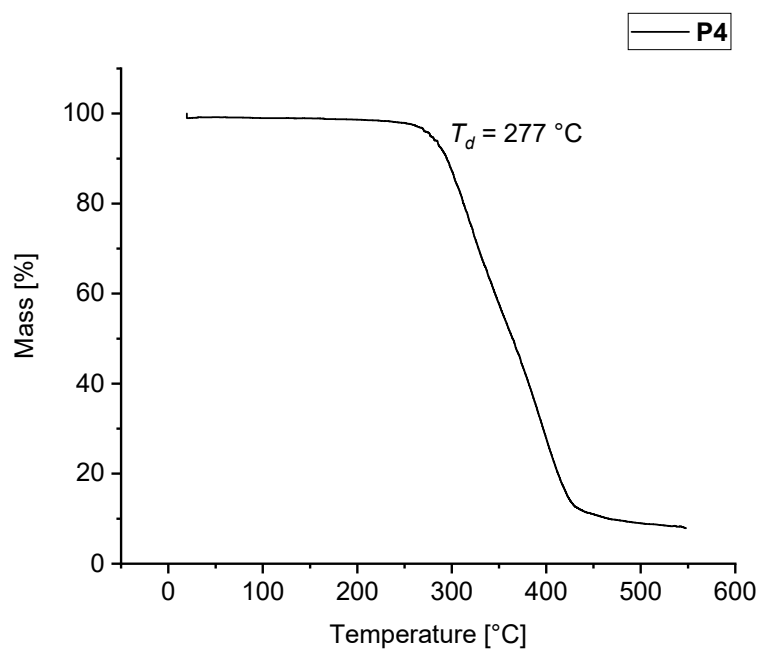

**Figure S6:** Trace of the TGA measurement of **P4**.

### 3. Animated surface of self-healing experiments

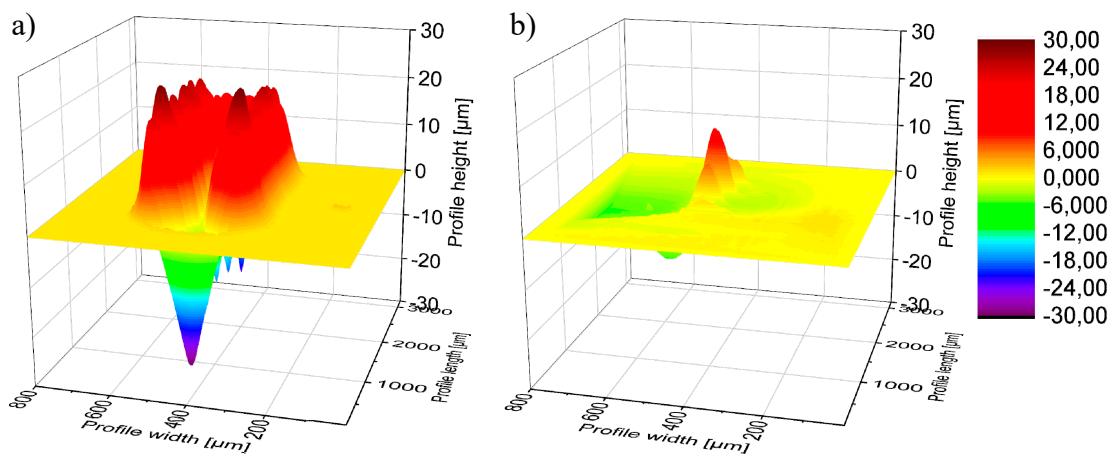

**Figure S7:** Schematic representation of the surface profile of a) the scratch and b) after 24 h healing at 100 °C (right) of metallopolymer **P2**.

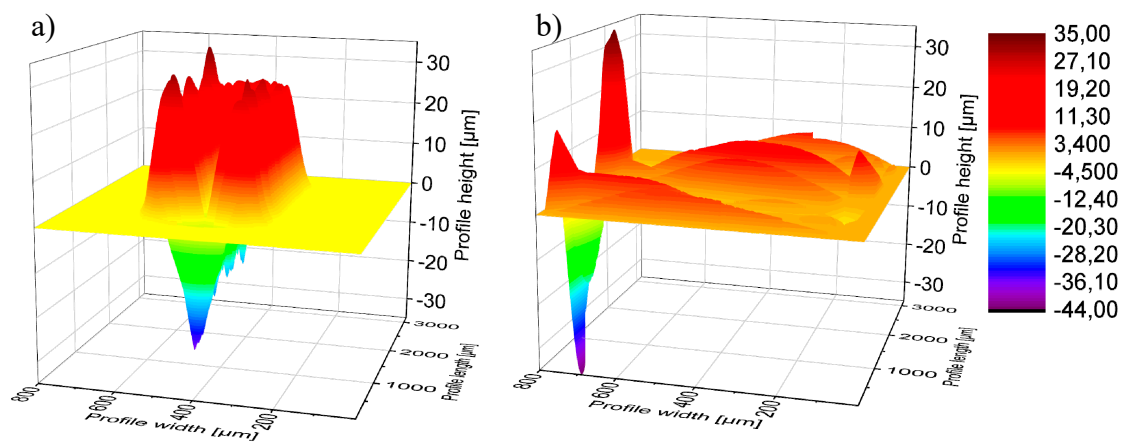

**Figure S8:** Schematic representation of the surface profile of a) the scratch and b) after 20 h healing at 100 °C of metallopolymer **P3**.
